# Supplementary material for: Using the Intrinsic Fluorescence of DNA to Characterize Aptamer Binding
Source: MDPI journal article supplement (doi:10.3390/molecules27227809), 2022-11-12
Supplement: s1 [file s1]

# **Supporting Information**

## **Using the Intrinsic Fluorescence of DNA to Characterize Aptamer Binding**

**Chang Lu<sup>1,2</sup>, Anand Lopez<sup>2</sup>, Jinkai Zheng<sup>1</sup> and Juewen Liu<sup>2,\*</sup>**

1 Institute of Food Science and Technology, Chinese Academy of Agricultural Sciences, Beijing 100193, China

2 Department of Chemistry, Waterloo Institute for Nanotechnology, University of Waterloo,  
Waterloo, ON, N2L 3G1, Canada

\* Correspondence: liujw@uwaterloo.ca

**Table S1.** The DNA Sequences Used in This Work

| Names                                              | Sequences and modifications (5'–3')                     |
|----------------------------------------------------|---------------------------------------------------------|
| A30                                                | AAA                 |
| T30                                                | TTT                 |
| C30                                                | CCC                 |
| Cortisol aptamer<br>(CSS.1)                        | GACGACGCCCGCATGTTCCATGGATAGTCTTGACTAGTCGTC              |
| Cortisol aptamer 4bp<br>(CSS.1-4bp)                | CGACGCCAGAAGTTTACGAGGATATGGTAACATAGTCG                  |
| Cortisol aptamer 3bp<br>(CSS.1-3bp)                | GACGCCAGAAGTTTACGAGGATATGGTAACATAGTC                    |
| Adenosine aptamer<br>(Apt <sub>ade</sub> )         | ACC TGG GGG AGT ATT GCG GAG GAA GGT                     |
| Adenosine aptamer<br>3bp (Apt <sub>ade</sub> -3bp) | CCT GGG GGA GTA TTG CGG AGG AAG G                       |
| Adenosine aptamer<br>2bp (Apt <sub>ade</sub> -2bp) | CTG GGG GAG TAT TGC GGA GGA AG                          |
| Caffeine aptamer<br>(Apt <sub>caff</sub> )         | GAC GAC TAC GGA GTT TTA GCC GTC ACG TTC CCA GGA GTC GTC |
| Caffeine aptamer<br>1bp (Apt <sub>caff</sub> -1bp) | TAC GGA GTT TTA GCC GTC ACG TTC CCA GGA                 |
| Caffeine aptamer<br>2bp (Apt <sub>caff</sub> -2bp) | CTA CGG AGT TTT AGC CGT CAC GTT CCC AGG AG              |
| Caffeine aptamer<br>3bp (Apt <sub>caff</sub> -3bp) | ACT ACG GAG TTT TAG CCG TCA CGT TCC CAG GAG T           |
| Caffeine aptamer<br>1bp (Apt <sub>caff</sub> -4bp) | GAC TAC GGA GTT TTA GCC GTC ACG TTC CCA GGA GTC         |
| 24-mer DNA                                         | ACGCATCTGTGAAGAGAACCTGGG                                |
| c-24-mer DNA                                       | CCCAGGTTCTCTTCACAGATGCGT                                |
| Glucose aptamer<br>(Apt <sub>glucose</sub> )       | ACG ACC GT TGT GTT GCT CTG TAA CAG TGT CCA TTG TCG T    |
| Quinine aptamer<br>(MN4)                           | GGC GAC AAG GAA AAT CCT TCA ACG AAG TGG GTC GCC         |

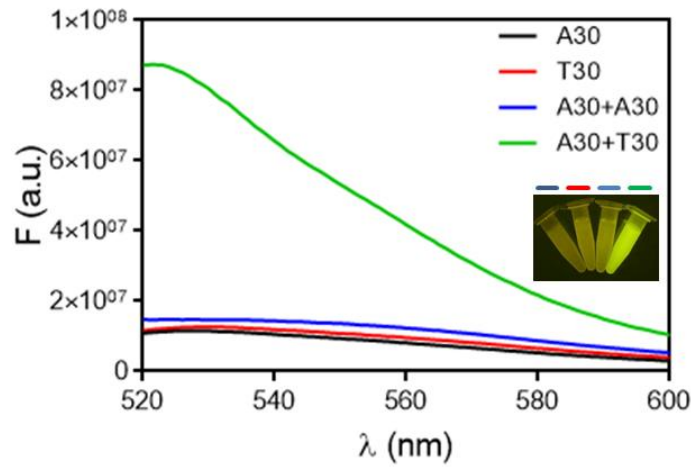

**Figure S1.** The fluorescence emission spectra of 100 nM ssDNA or dsDNA stained by 0.5x SGI in buffer (10 mM PB, 100 mM NaCl, pH=7), Ex=485 nm, Em=520 nm-600 nm. Inset: a photograph of the samples.

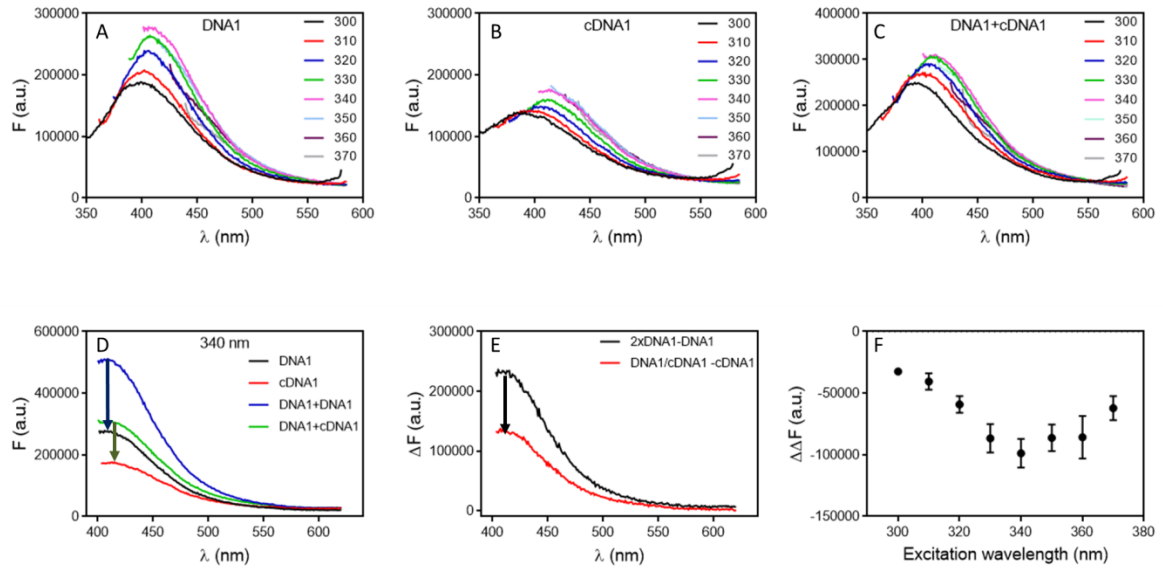

**Figure S2.** The fluorescence emission spectrum of 5  $\mu$ M (A) 24-mer random sequenced DNA (DNA1), (B) its complementary DNA (cDNA1), and (C) double stranded DNA (DNA1+cDNA1) excited at different wavelength in buffer (10 mM PB, 100 mM NaCl, pH=7). (D) Comparison of fluorescence emission spectrum of ssDNA and dsDNA with excitation wavelength at 340 nm. (E) The fluorescence emission spectrum difference of ssDNA (2xDNA1-DNA1) and dsDNA (DNA1/cDNA1 - cDNA1) with excitation wavelength at 340 nm. (F) The maximum fluorescence difference of ssDNA and dsDNA with different excitation wavelength.

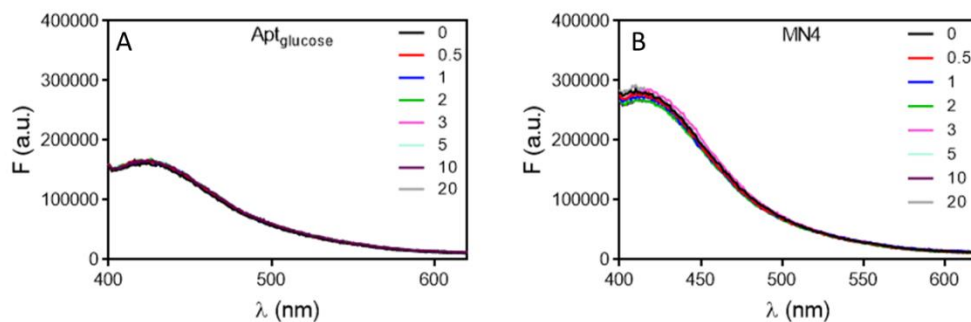

**Figure S3.** Fluorescence of 5  $\mu$ M (A) glucose and (B) quinine aptamer upon titration of cortisol in buffer (10 mM PB, 100 mM NaCl, 10 mM MgCl<sub>2</sub> pH=7). Ex=340 nm, Em = 400 nm-620 nm.

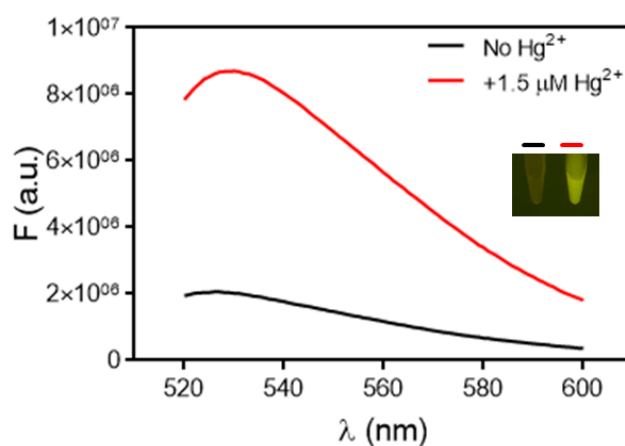

**Figure S4.** The fluorescence emission spectrum of 0.5 $\times$ SYBR Green I after adding 100 nM T30 and 0 or 1.5  $\mu$ M Hg<sup>2+</sup> in buffer (10 mM PB, 100 mM NaNO<sub>3</sub>, pH=7), Ex=485 nm, Em=520 nm-600 nm.

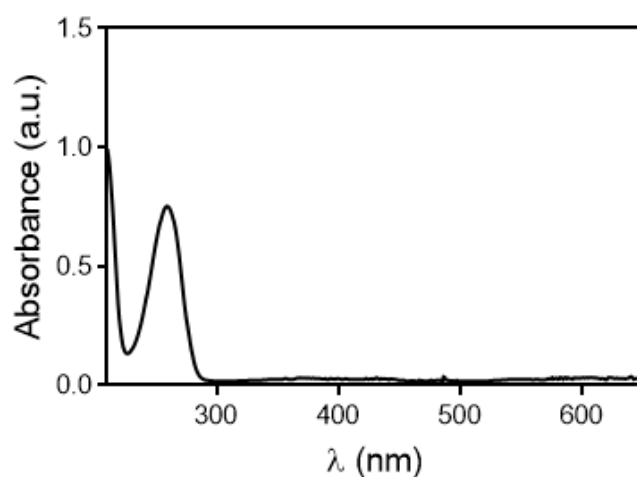

**Figure S5.** UV-vis spectra of 50  $\mu$ M adenosine.

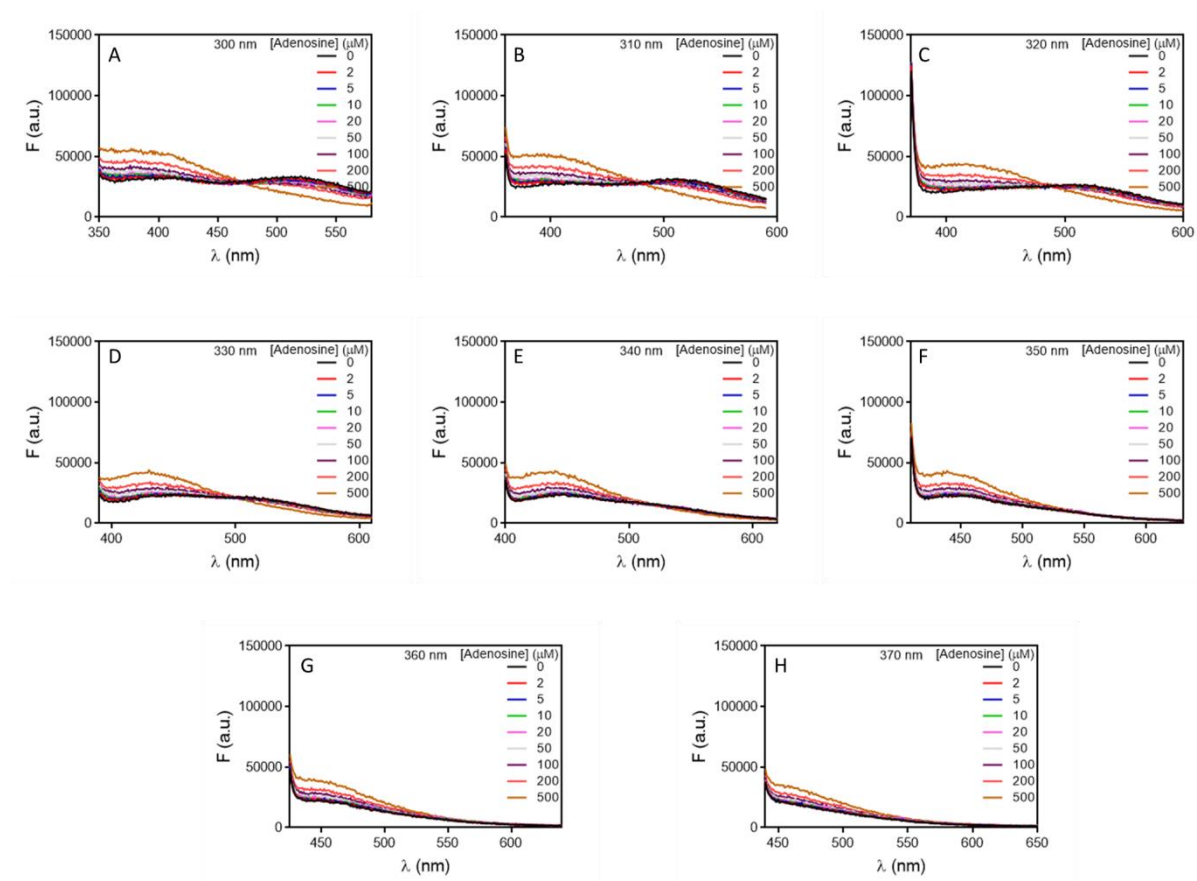

**Figure S6.** The fluorescence emission spectra of different concentrations of adenosine in buffer (10 mM PB, 100 mM NaCl, 10 mM  $\text{MgCl}_2$  pH=7) excited by different wavelength (300 nm–370 nm).

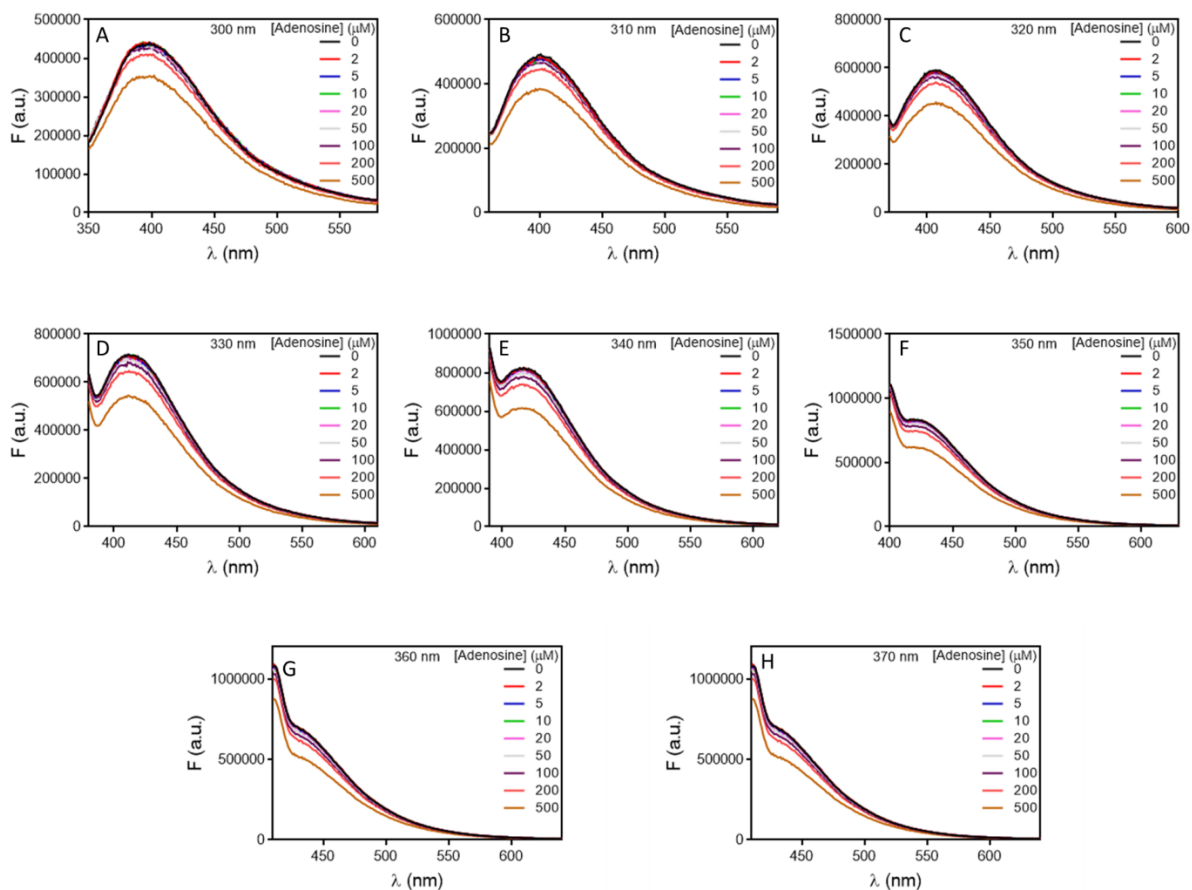

**Figure S7.** The fluorescence emission spectra of 5  $\mu\text{M}$  of the adenosine aptamer upon titration of adenosine excited at different wavelengths (300 nm–370 nm).

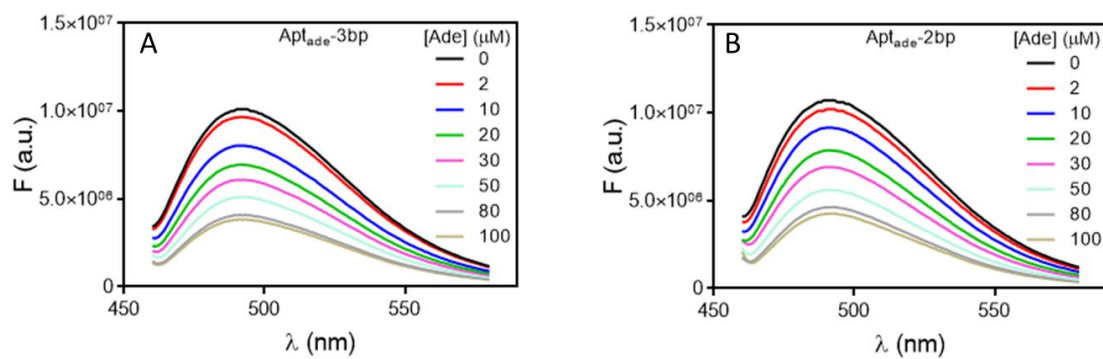

**Figure S8.** The fluorescence emission spectrum of 2  $\mu\text{M}$  ThT after adding 100 nM (A) 3bp and (B) 2bp adenosine aptamer and different concentration of adenosine in buffer (10 mM PB, 100 mM NaCl, 10 mM  $\text{MgCl}_2$  pH=7),  $E_x=450$  nm,  $E_m=460$  nm–580 nm.

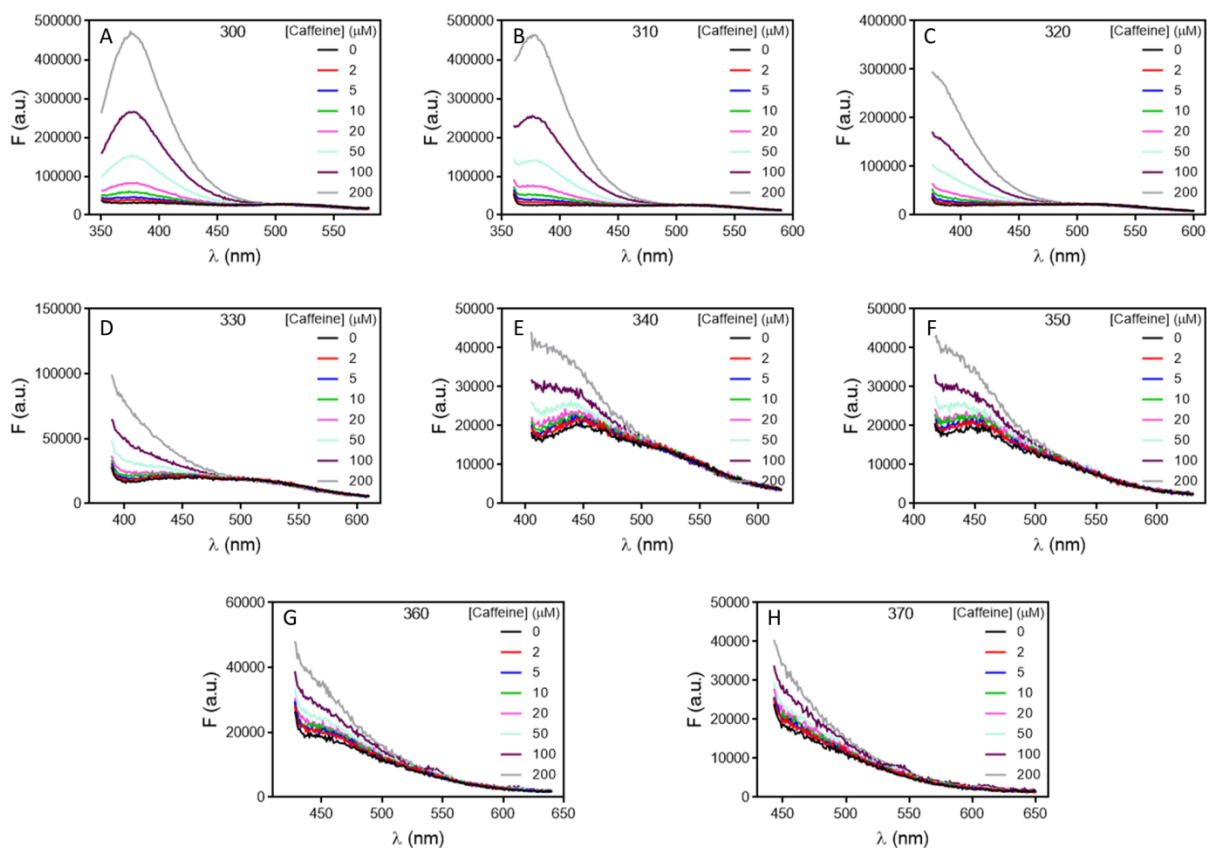

**Figure S9.** The fluorescence emission spectra of different concentration of caffeine in buffer (10 mM PB, 100 mM NaCl, 10 mM  $\text{MgCl}_2$  pH=7) excited at different wavelengths (300 nm-370 nm).

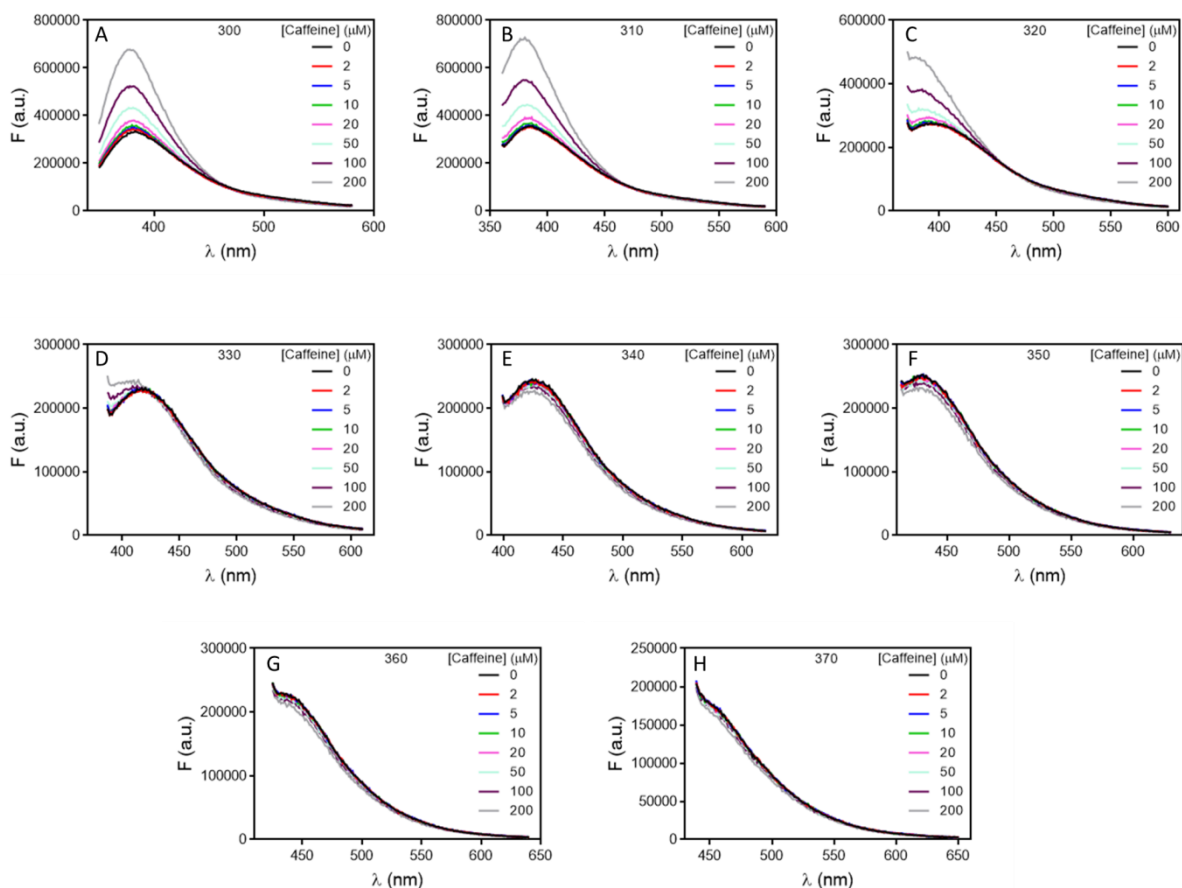

**Figure S10.** The fluorescence emission spectra of the caffeine aptamer (5  $\mu\text{M}$ ) upon titration of caffeine excited by different wavelength (300 nm-370 nm).

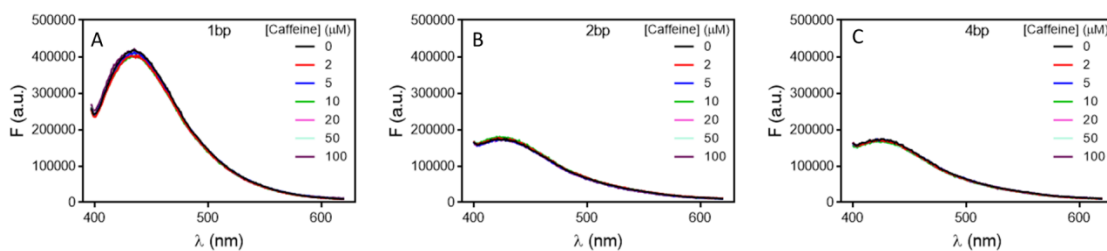

**Figure S11.** Fluorescence of the (A) 1bp, (B) 2bp and (C) 4bp caffeine aptamer upon titration of caffeine.
